# Supplementary material for: Host–guest interaction between cyclen based macrotricyclic ligands and phosphate anions. A potentiometric investigation
Source: Royal Society of Chemistry journal article supplement (doi:10.1039/b517695f), 2006-01-01
Supplement: b517695f.pdf [file b517695f.pdf]

**Host-guest interaction between cyclen based macrotricyclic ligands and phosphate anions. A potentiometric investigation.**

**Stéphanie Develay,<sup>a</sup> Raphaël Tripier <sup>a</sup>, Michel Le Baccon <sup>a</sup>, Véronique Patinec <sup>a</sup>, Guy Serratrice<sup>b</sup> and Henri Handel\* <sup>a</sup>**

*<sup>a</sup>UMR CNRS 6521, "Chimie, Electrochimie Moléculaire et Analytique", Université de Bretagne Occidentale, C. S. 93837, 6 avenue Victor Le Gorgeu, 29238 Brest Cedex 3, France. Fax: 33 2 98016138; Tel: 33 2 9801700; E-Mail: Henri.Handel@univ-brest.fr.*

*<sup>b</sup>UMR CNRS 5616, Université Joseph Fourier, LEDSS, B.P. 53, 38041, Grenoble cedex 9, France.*

**Electronic Supplementary Material.**

### (Macrotricycles : Orthophosphate) systems

Logarithm recognition constants,  $\log K_{alh}$ ,

| orthophosphate                                     | <i>TOC</i>  | <i>TMC</i>   | <i>TPC</i>  |
|----------------------------------------------------|-------------|--------------|-------------|
| A+L+2H=ALH <sub>2</sub>                            | 24,35       | 24,43        | 24,14       |
| AH+LH=ALH <sub>2</sub>                             |             | 2,82         | 3,37        |
| A+L+3H=ALH <sub>3</sub>                            | 33,44(9,09) | 33,06 (8,62) | 32,84(8,70) |
| AH+LH <sub>2</sub> =ALH <sub>3</sub>               |             | 2,98         | 3,37        |
| A+L+4H=ALH <sub>4</sub>                            | 41,48(8,04) | 40,59 (7,53) | 40,4(7,56)  |
| AH+LH <sub>3</sub> =ALH <sub>4</sub>               |             | 3,59         | 3,64        |
| A+L+5H=ALH <sub>5</sub>                            | 48,24(6,76) | 47,82 (7,23) | 47,42(7,02) |
| AH+LH <sub>4</sub> =ALH <sub>5</sub>               |             |              | 4,02        |
| AH <sub>2</sub> +LH <sub>3</sub> =ALH <sub>5</sub> |             | 3,60         |             |
| A+L+6H=ALH <sub>6</sub>                            | 54,74(6,5)  | 53,92 (6,10) | 53,54(6,12) |
| AH <sub>2</sub> +LH <sub>4</sub> =ALH <sub>6</sub> |             | 3,94         | 3,37        |
| A+L+7H=ALH <sub>7</sub>                            | 57,85(3,11) |              | 55,96(2,42) |
| AH <sub>2</sub> +LH <sub>5</sub> =ALH <sub>7</sub> |             | 4,92         | 3,17        |

$I = 0,1 \text{ M (NaCl)} ; T = 298 \text{ K}$

### Competition systems between two ligands for orthophosphate

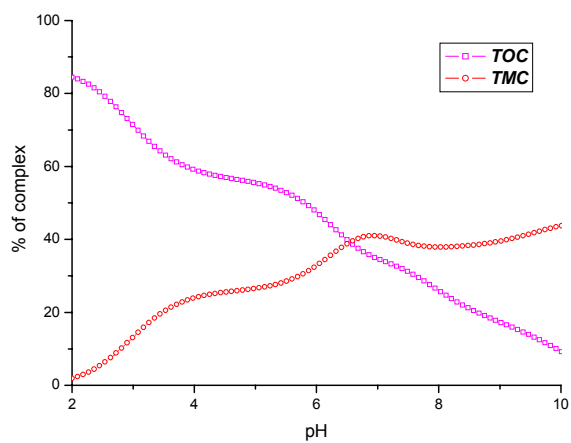

(a)

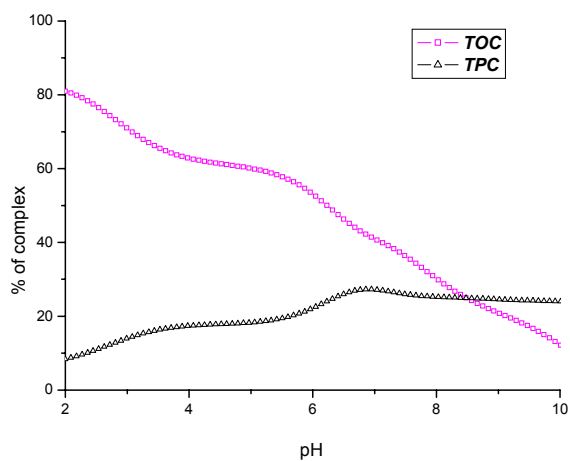

(b)

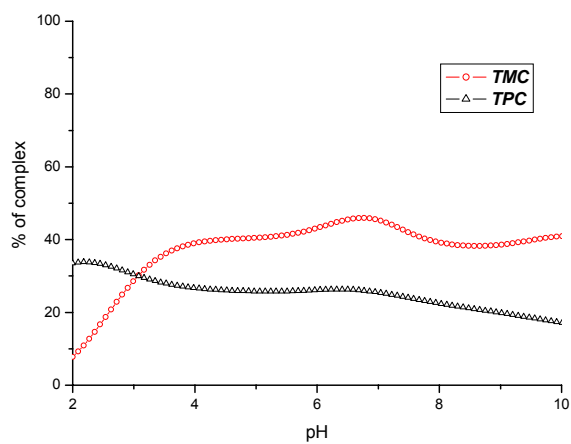

(c)

(a) *TMC : TOC*

(b) *TOC : TPC*

(c) *TMC : TPC*

## (Macrotricyclic : pyrophosphate) systems

Logarithm recognition constants,  $\log K_{alh}$ ,

| pyrophosphate                                      | TOC         | TMC         | TPC         |
|----------------------------------------------------|-------------|-------------|-------------|
| A+L+H = ALH                                        | 13.86       | 14,33(9,50) |             |
| A+LH = ALH                                         | 3,72        | 4,66        |             |
| A+L+2H=ALH <sub>2</sub>                            | 23.04(9,18) | 23,24(8,91) | 21,56)      |
| A+LH <sub>2</sub> =ALH <sub>2</sub>                | 3,97        | 4,82        | 3,14        |
| A+L+3H=ALH <sub>3</sub>                            | 31.81(8,77) | 31,38(8,14) | 29,74(8,18) |
| AH+LH <sub>2</sub> =ALH <sub>3</sub>               | 4,39        | 4,73        | 2,97        |
| A+L+4H=ALH <sub>4</sub>                            | 39.38(7,57) | 38,9(7,52)  | 37,33(7,59) |
| AH+LH <sub>3</sub> =ALH <sub>4</sub>               | 4,53        | 4,99        | 3,27        |
| A+L+5H=ALH <sub>5</sub>                            | 46.13(6,75) | 45,72(6,82) | 44,3(6,97)  |
| AH+LH <sub>4</sub> =ALH <sub>5</sub>               | 5,12        | 4,96        | 3,63        |
| A+L+6H=ALH <sub>6</sub>                            | 51.99(5,86) | 51,35(5,63) | 49,70(5,40) |
| AH <sub>2</sub> +LH <sub>4</sub> =ALH <sub>6</sub> | 4,93        | 4,54        | 2,98        |
| A+L+7H=ALH <sub>7</sub>                            | 54.91(2,92) |             | 52,48(2,78) |
| AH <sub>2</sub> +LH <sub>5</sub> =ALH <sub>7</sub> | 5,72        |             | 3,43        |

$I = 0,1 \text{ M (NaCl)} ; T = 298 \text{ K}$

### Competition systems between two ligands for pyrophosphate

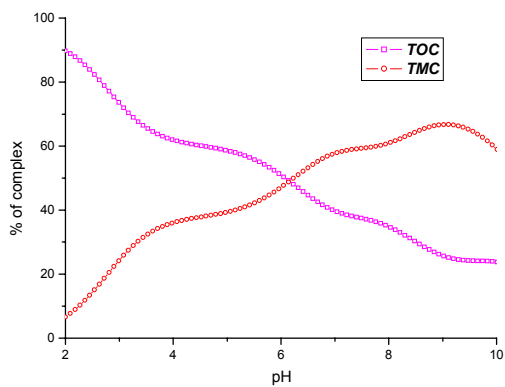

(a)

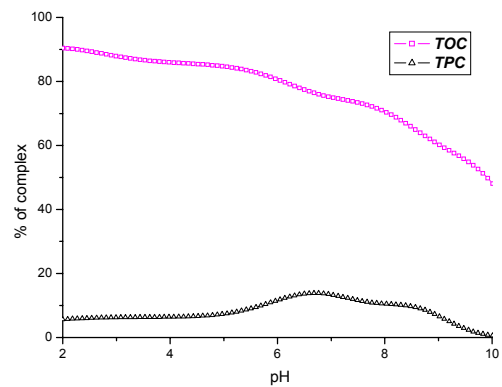

(b)

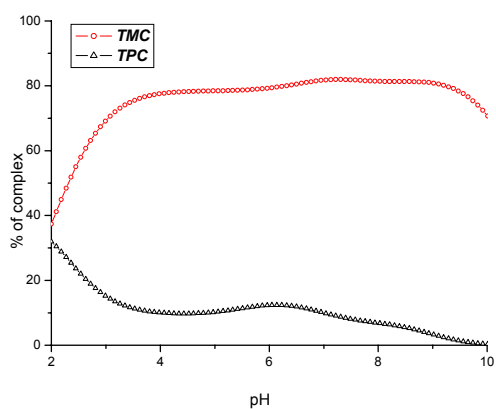

(c)

(a) *TMC* : *TOC*

(b) *TOC* : *TPC*

(c) *TMC* : *TPC*

## (Macrotricycles : triphosphate) systems

Logarithm recognition constants,  $\log K_{alh}$ ,

| Triphosphate                                       | <i>TOC</i>  | <i>TMC</i>  | <i>TPC</i>  |
|----------------------------------------------------|-------------|-------------|-------------|
| A+L+H = ALH                                        | 13,58       |             | 12,45       |
| A+LH = ALH                                         |             | 3,44        | 2,68        |
| A+L+2H=ALH <sub>2</sub>                            | 22,73(9,15) | 22,05       | 22,31(9,86) |
| A+LH <sub>2</sub> =ALH <sub>2</sub>                |             | 3,66        | 3,89        |
| A+L+3H=ALH <sub>3</sub>                            | 31,39(8,66) | 30,46(8,41) | 30,89(8,58) |
| AH+LH <sub>2</sub> =ALH <sub>3</sub>               |             | 4,34        | 4,49        |
| A+L+4H=ALH <sub>4</sub>                            | 38,94(7,55) | 38,43(7,97) | 38,74(7,85) |
| AH+LH <sub>3</sub> =ALH <sub>4</sub>               |             | 4,46        | 5,05        |
| A+L+5H=ALH <sub>5</sub>                            | 45,86(6,92) | 45,68(7,25) | 45,89(7,15) |
| AH+LH <sub>4</sub> =ALH <sub>5</sub>               |             | 5,22        | 5,59        |
| A+L+6H=ALH <sub>6</sub>                            | 51,32(5,46) | 52,28(6,60) | 52,27(6,38) |
| AH <sub>2</sub> +LH <sub>4</sub> =ALH <sub>6</sub> |             | 4,94        | 6,23        |
| A+L+7H=ALH <sub>7</sub>                            | 53,75(2,43) | 57,49(5,21) | 57,11(4,84) |
| AH <sub>2</sub> +LH <sub>5</sub> =ALH <sub>7</sub> |             | 5,24        | 8,74        |
| A+L+8H=ALH <sub>8</sub>                            |             |             |             |
| A+LH <sub>2</sub> =ALH <sub>8</sub>                |             |             |             |

$I = 0,1 \text{ M (NaCl)} ; T = 298 \text{ °K}$

### Competition systems between two ligands for triphosphate

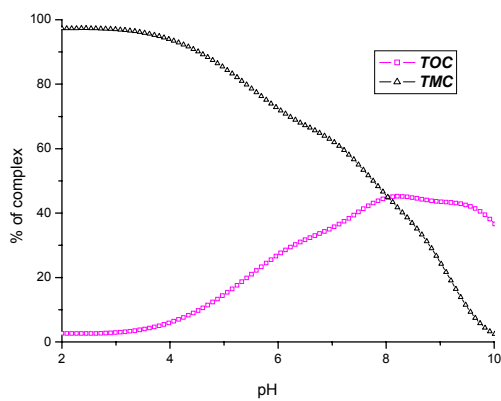

(a)

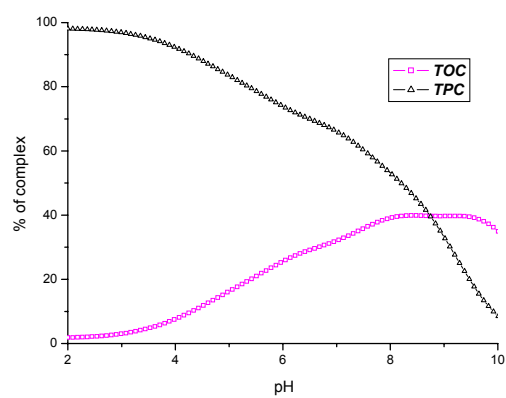

(b)

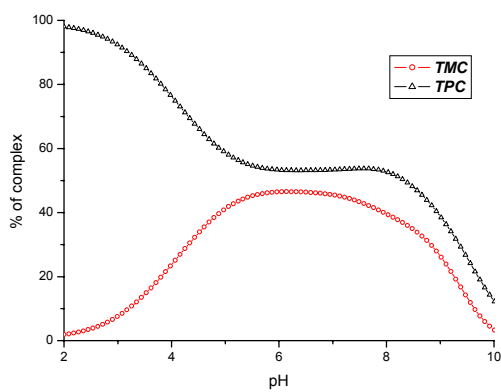

(c)

(a) *TMC* : *TOC*

(b) *TOC* : *TPC*

(c) *TMC* : *TPC*

## Macrotricycles selectivity

• **TOC**

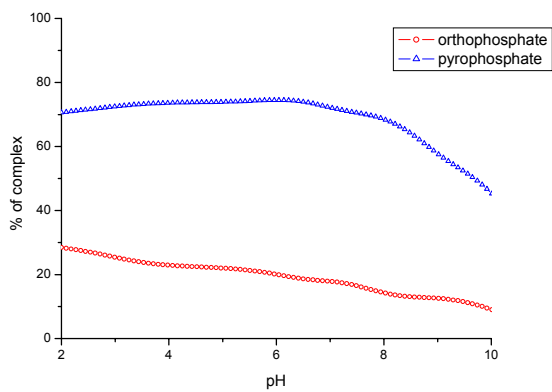

(a)

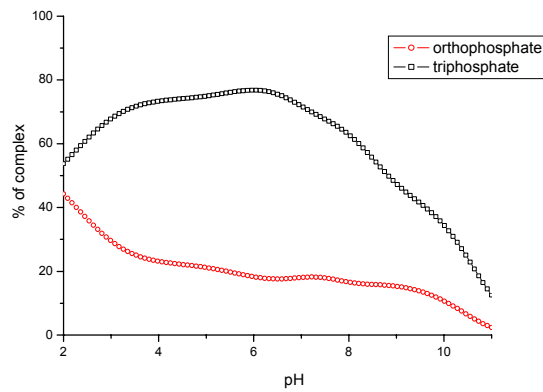

(b)

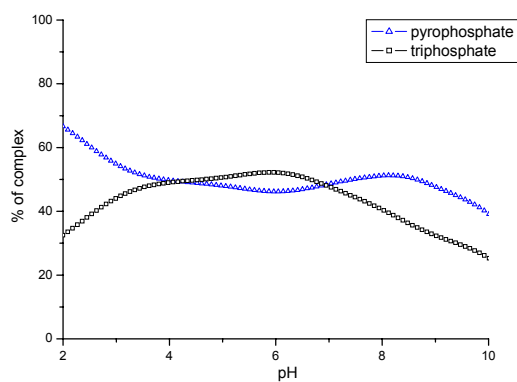

(c)

(a) orthophosphate : pyrophosphate

(b) orthophosphate : triphosphate

(c) pyrophosphate : triphosphate



• **TMC**

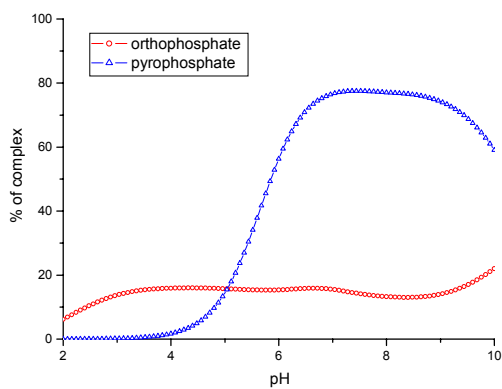

**(a)**

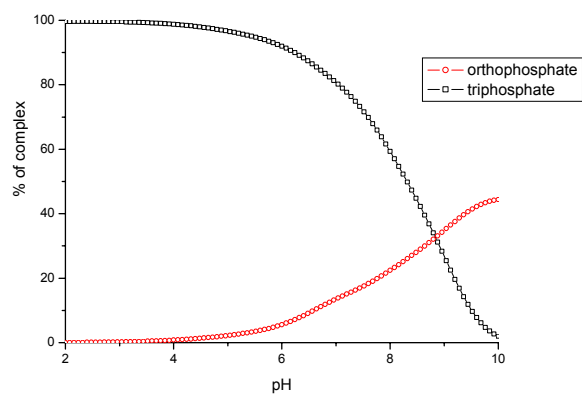

**(b)**

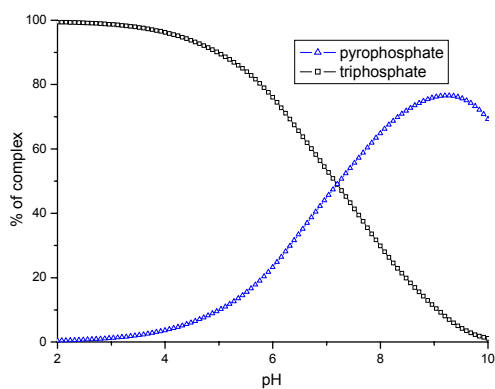

**(c)**

**(a) orthophosphate : pyrophosphate**

**(b) orthophosphate : triphosphate**

**(c) pyrophosphate : triphosphate**

• **TPC**

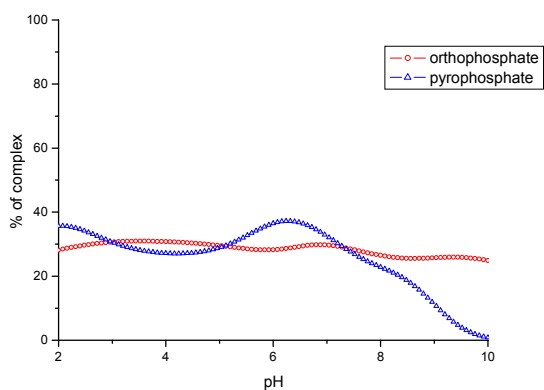

**(a)**

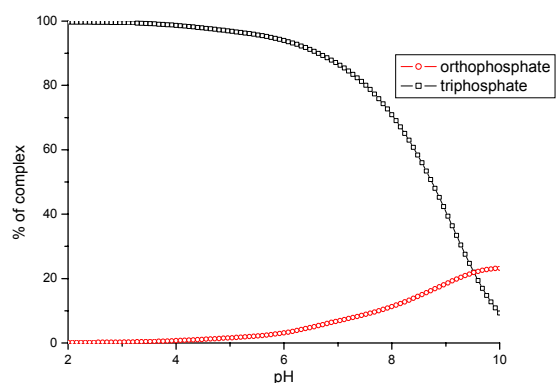

**(b)**

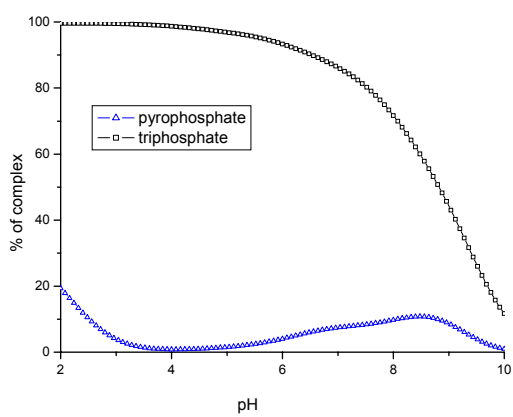

**(c)**

**(a) orthophosphate : pyrophosphate**

**(b) orthophosphate : triphosphate**

**(c) pyrophosphate : triphosphate**

## Competition: bismacrocycles / macrotricycles

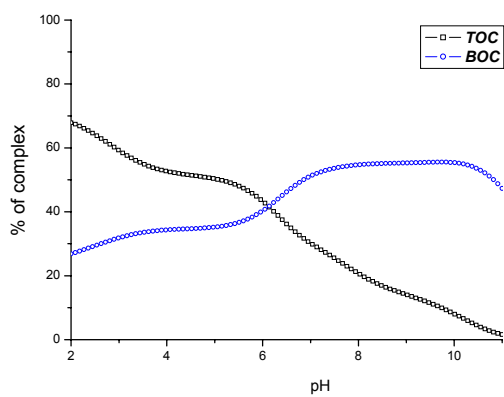

(a)

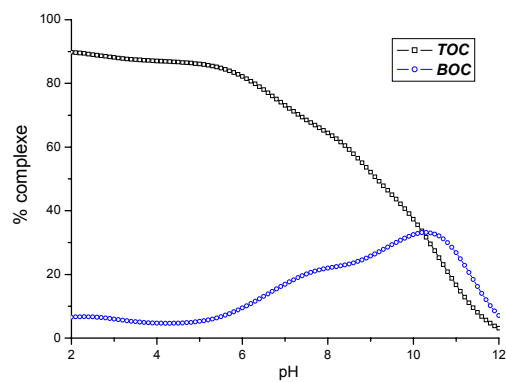

(b)

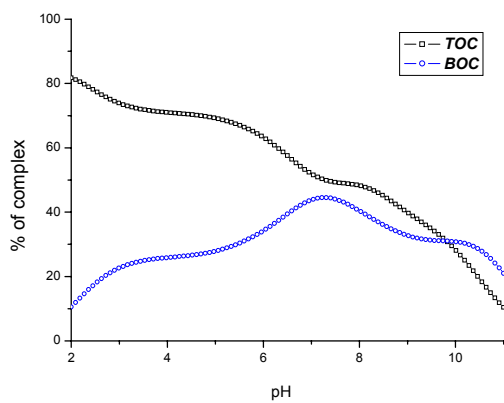

(c)

**BOC : TOC / (a) orthophosphate ; (b) pyrophosphate (c) triphosphate**

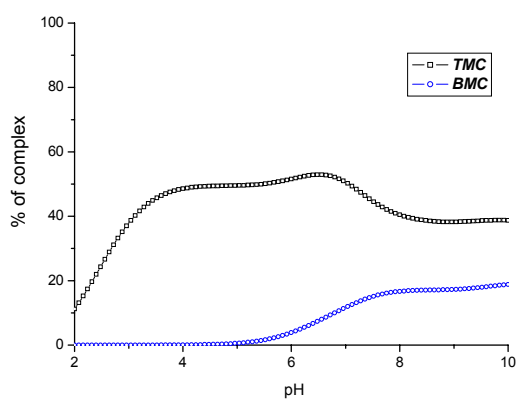

(a)

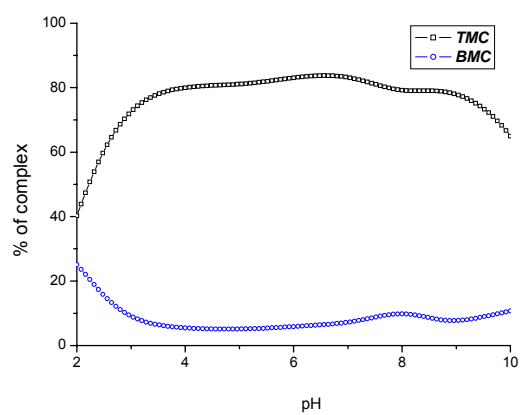

(b)

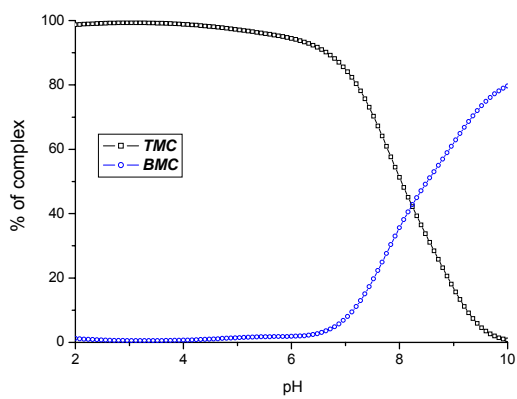

(c)

*BMC* : *TMC* / (a) orthophosphate ; (b) pyrophosphate (c) triphosphate

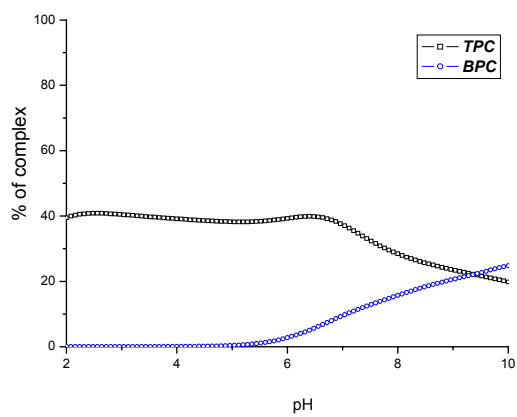

(a)

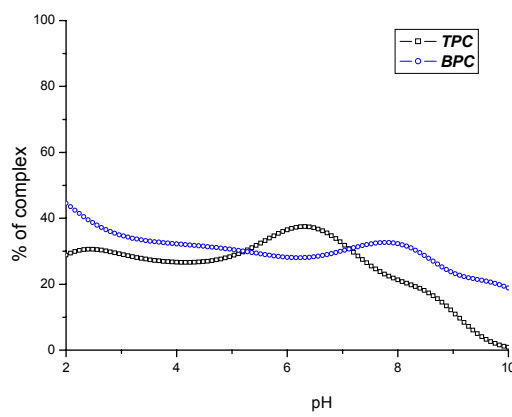

(b)

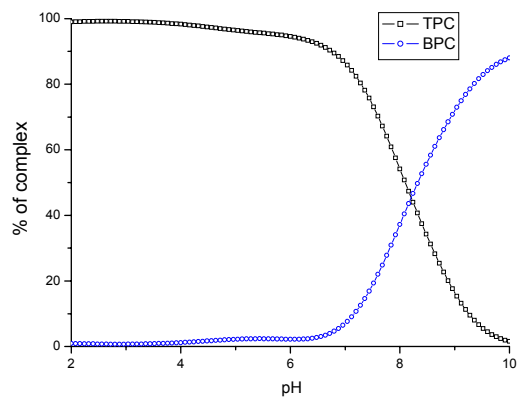

(c)

*BPC : TPC* / (a) orthophosphate ; (b) pyrophosphate (c) triphosphate
